# Supplementary material for: Non-invasive transferrin targeted nanovesicles sensitize resistant glioblastoma multiforme tumors and improve survival in orthotopic mouse models
Source: Royal Society of Chemistry journal article supplement (doi:10.1039/d1nr05460k), 2021-12-13
Supplement: d1nr05460k1.pdf [file d1nr05460k1.pdf]

## Supplementary Materials

a

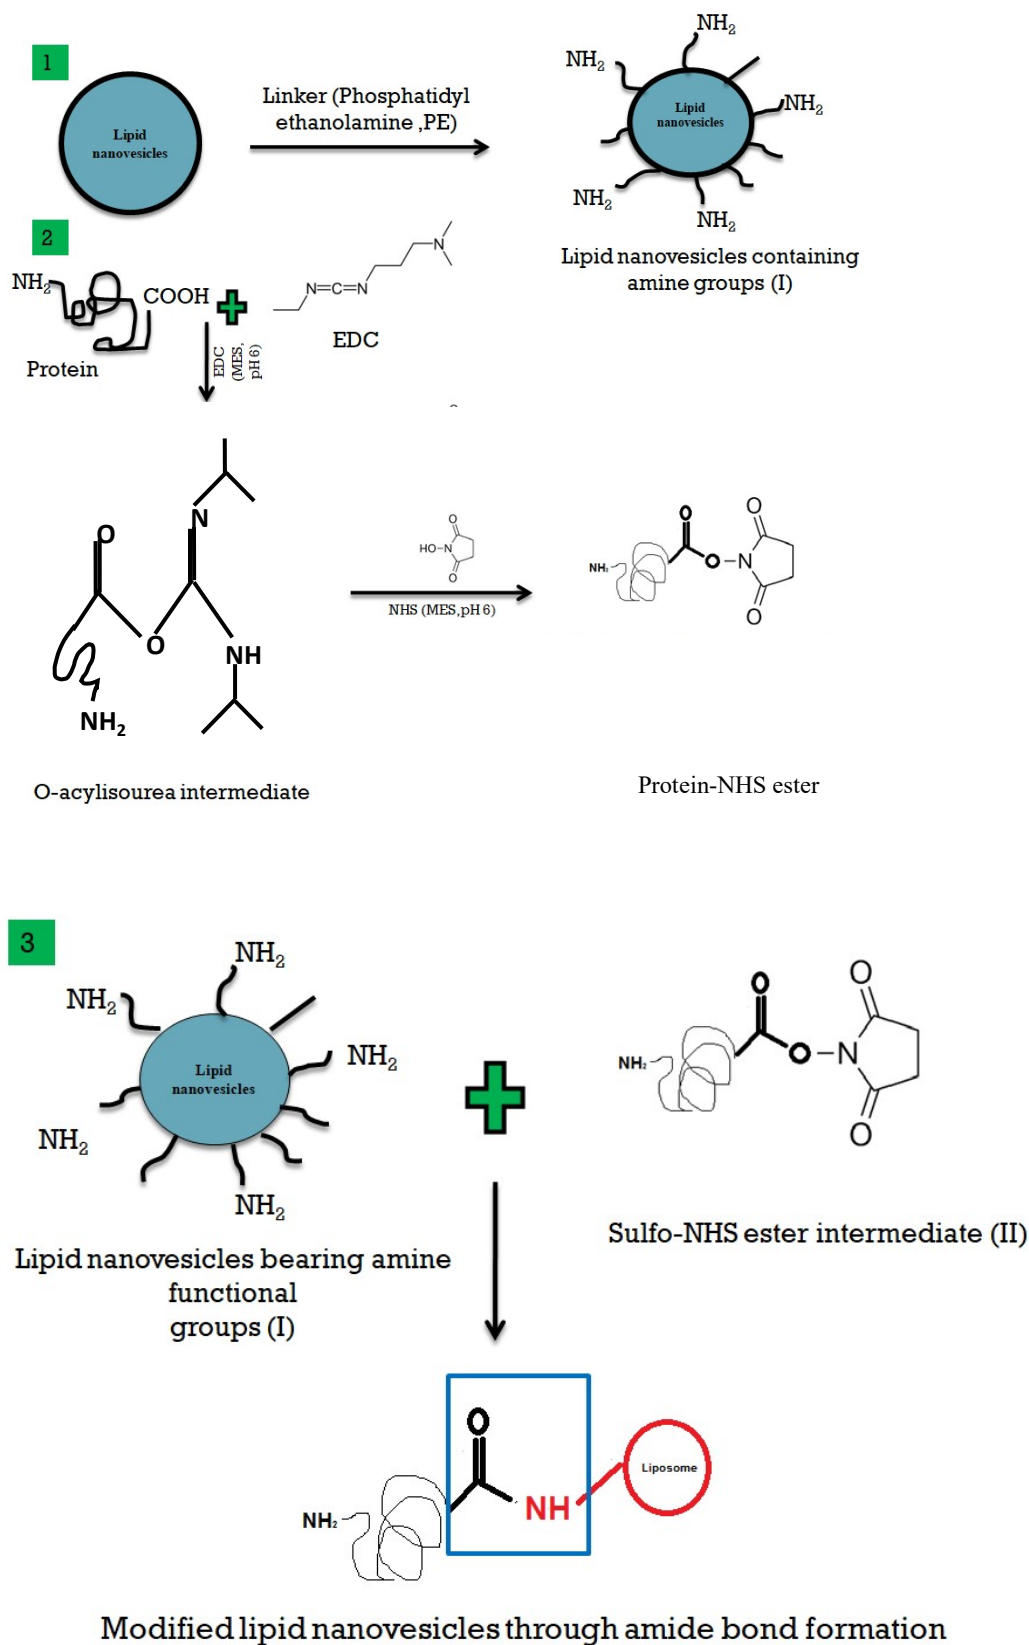

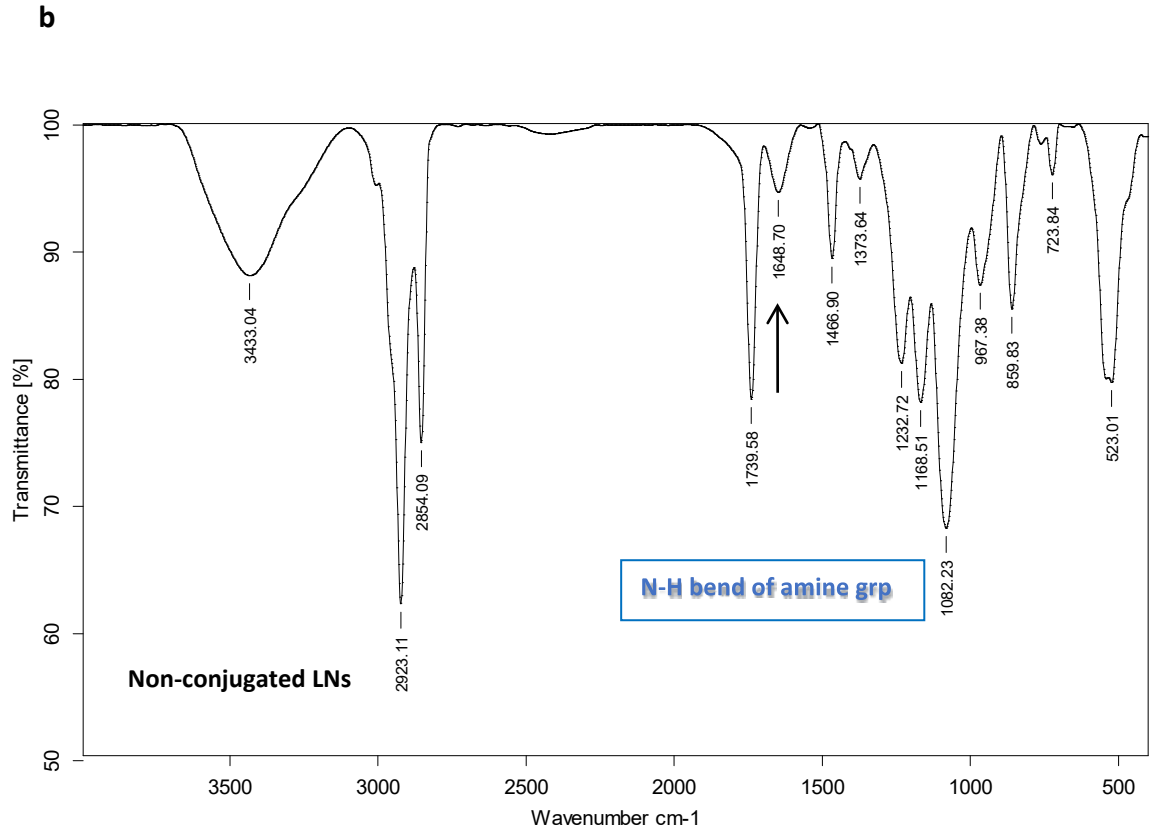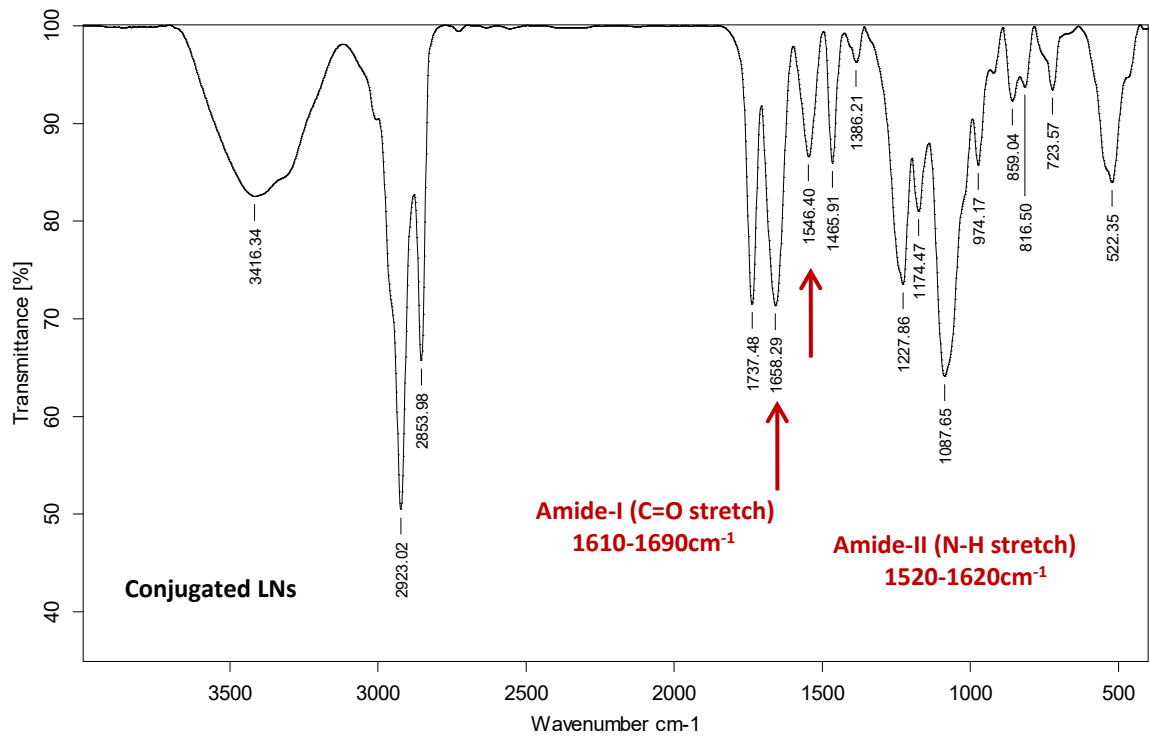

c

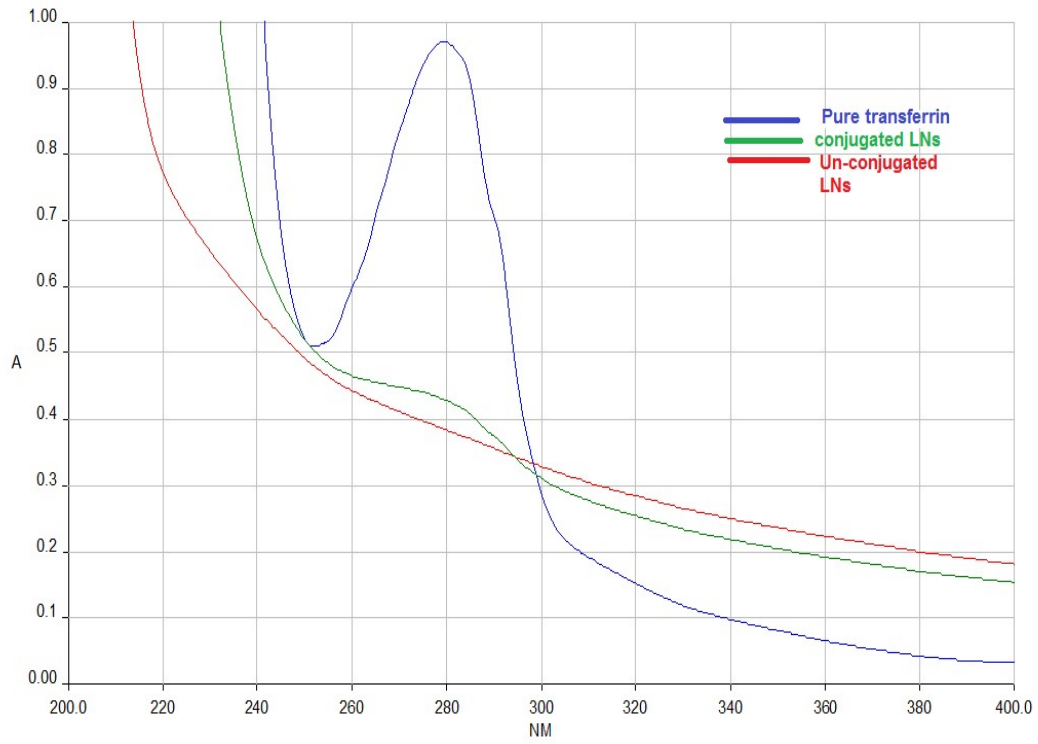

d

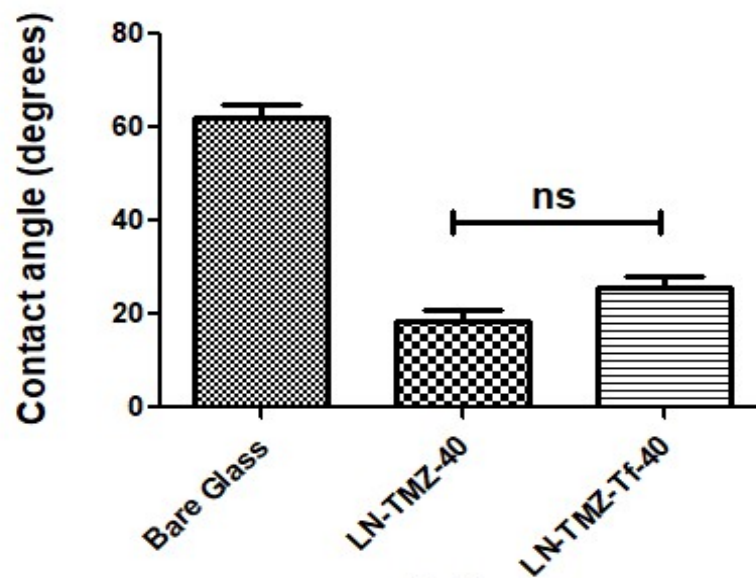

**Figure. S1. (a)** Schematic representation of preparation of transferrin (Tf) modified lipid nanovesicles using N-hydroxysuccinimide (NHS) and 1-ethyl-3-[3-dimethylaminopropyl] carbodiimide (EDC) based chemistry in 2-(N-morpholino) ethanesulfonic acid (MES) buffer at pH 6.0. **(b)** Fourier transformed infra-red spectra (FTIR) of conjugated and non-conjugated lipid nanovesicles (LNs) and **(c)** UV-Visible spectra exhibiting characteristic absorbance peak of pure transferrin, transferrin conjugated and non-conjugated lipid nanovesicles (LNs) **(d)** Contact angle measurement of targeted (LNs-TMZ-Tf-40) and non-targeted (LNs-TMZ-40) nanovesicles with mucin (2%w/v) as the contacting fluid (n=3, mean±SEM, at no significant difference of  $^{ns}p \geq 0.05$ )

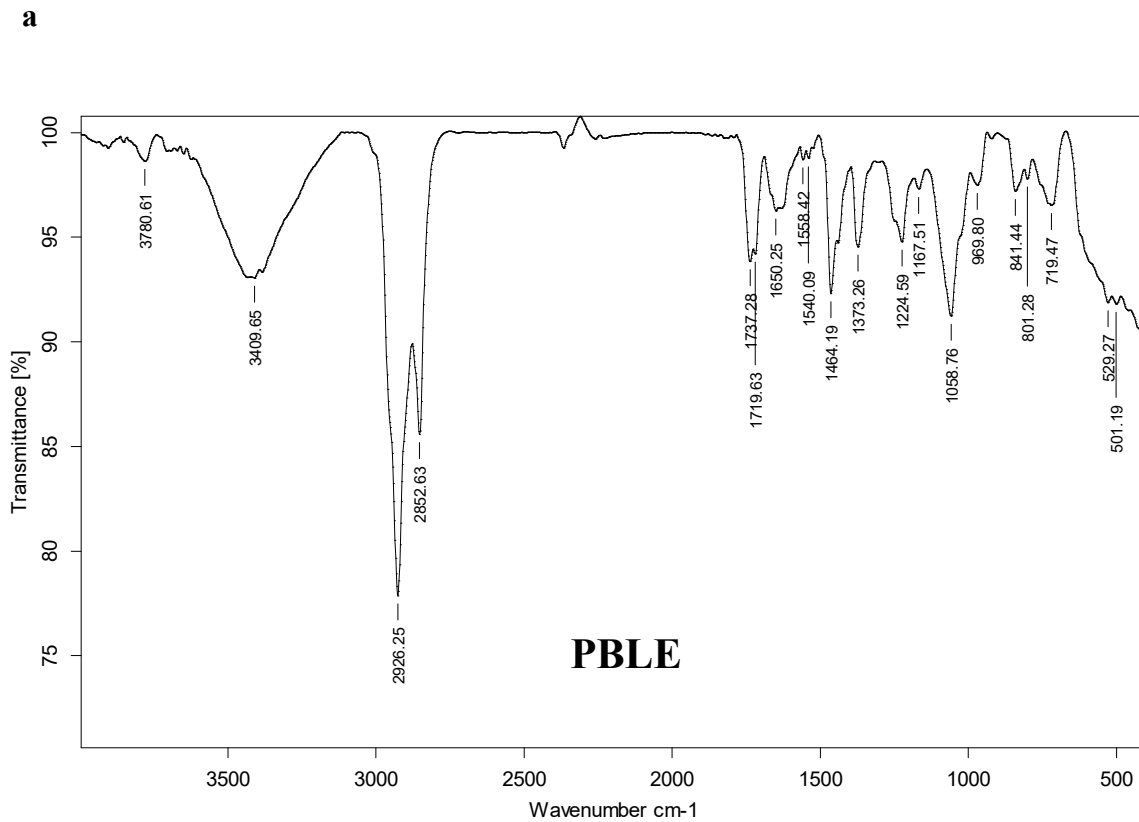

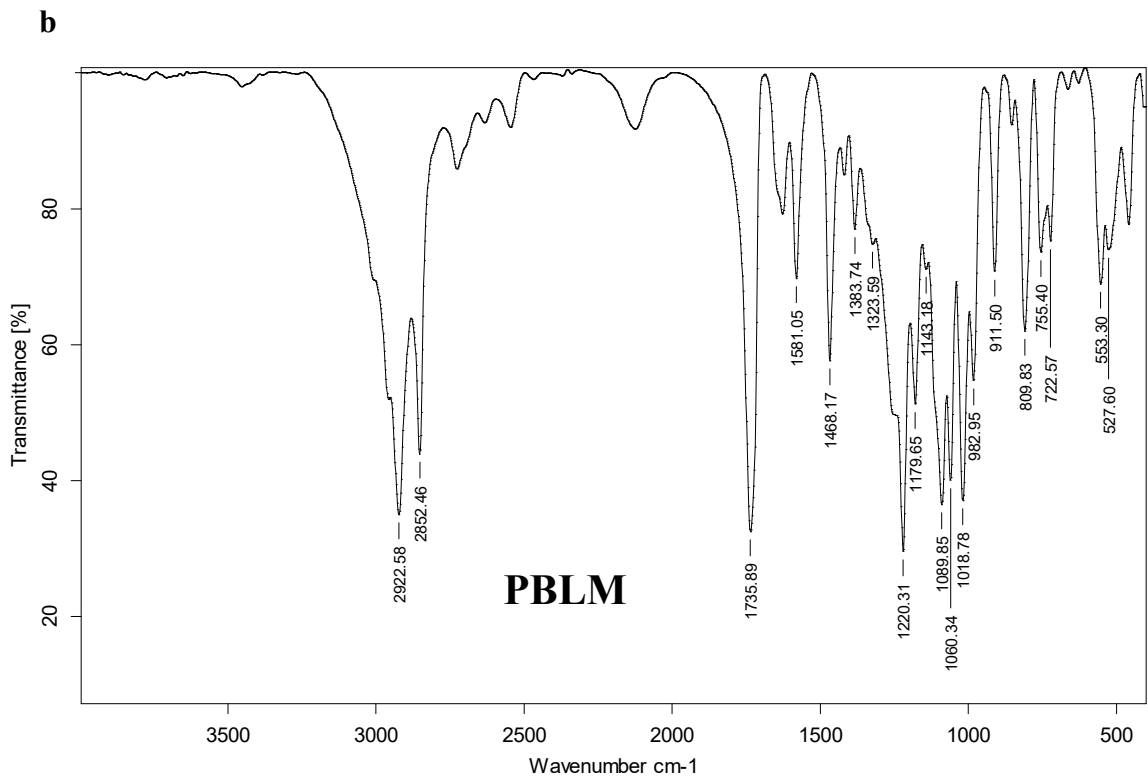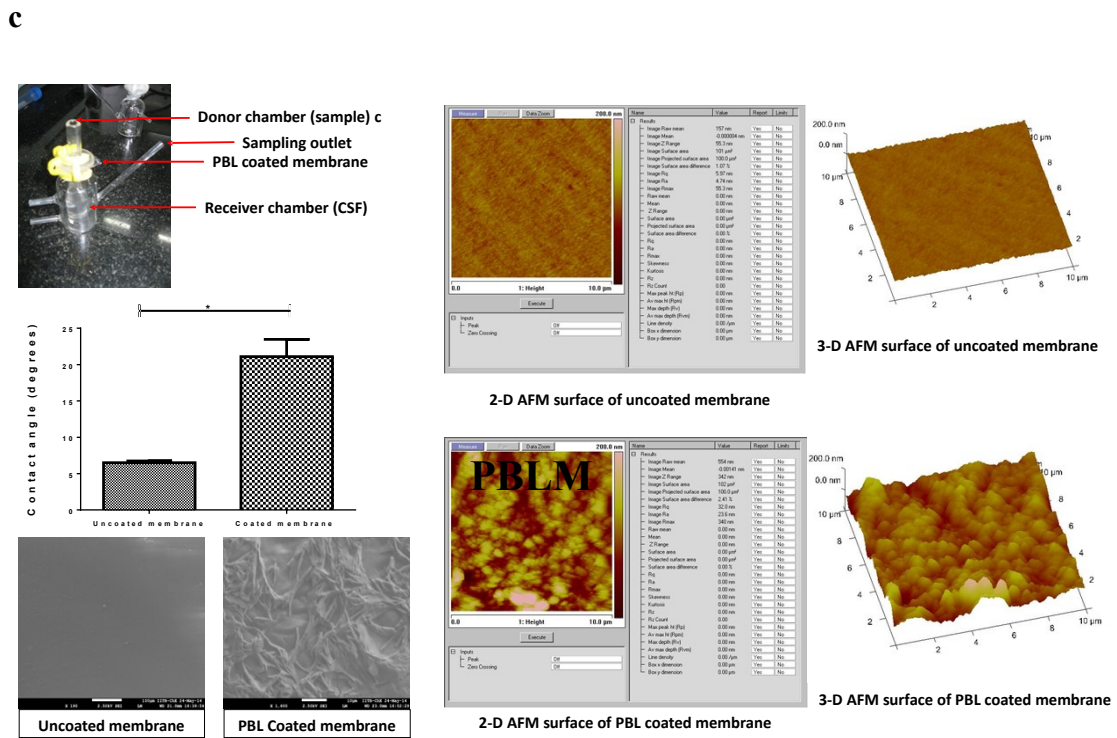

**Figure. S2. *Ex-vivo* Parallel Artificial Membrane Permeability Assay (PAMPA).** (a,b) Characterization of porcine brain lipid extract (PBLE) by fourier transformed infra-red spectroscopy (FTIR) (a) IR spectra of porcine brain lipid extract (PBLE) and (b) Polar brain lipids mixture (made by mixing the constituents lipids) to be impregnated on the porous filter for PAMPA study (c) Schematic of *ex-vivo* Parallel artificial membrane permeability assay (PAMPA) using Franz's diffusion cells showing contact angle of the porcine brain lipid extract (PBLE) coated membrane with water as the contacting fluid and uncoated membrane as control ( $*p \leq 0.05$ ,  $n=3$ ) with characterizations of membranes by Cryo-FEG-SEM (scale bar: 10 $\mu$ m for PBL coated and 100 $\mu$ m for uncoated membrane) and Atomic Force Microscopy (scale bar: 10 $\mu$ m for PBL coated and uncoated membrane).

a

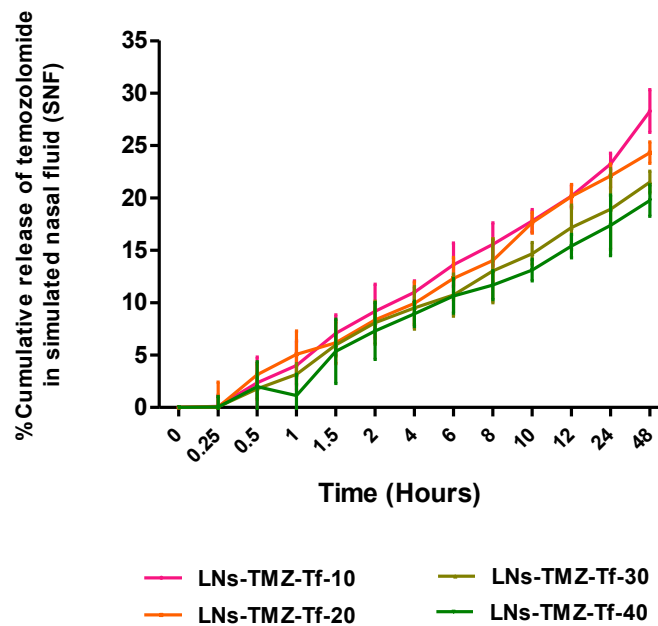

b

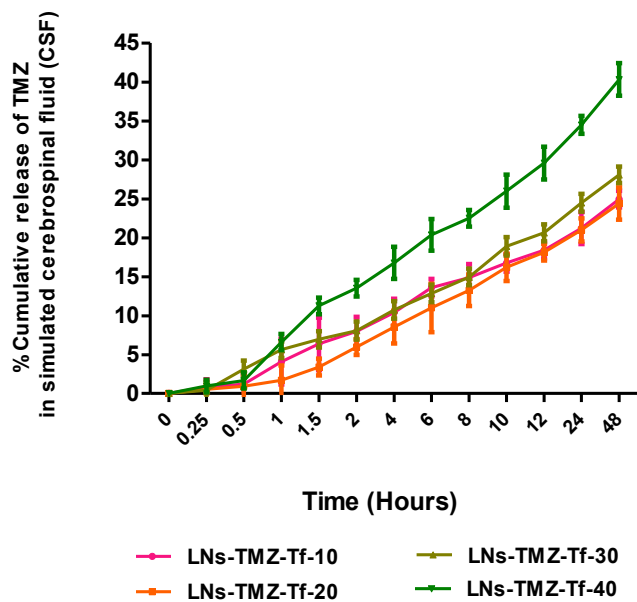

c

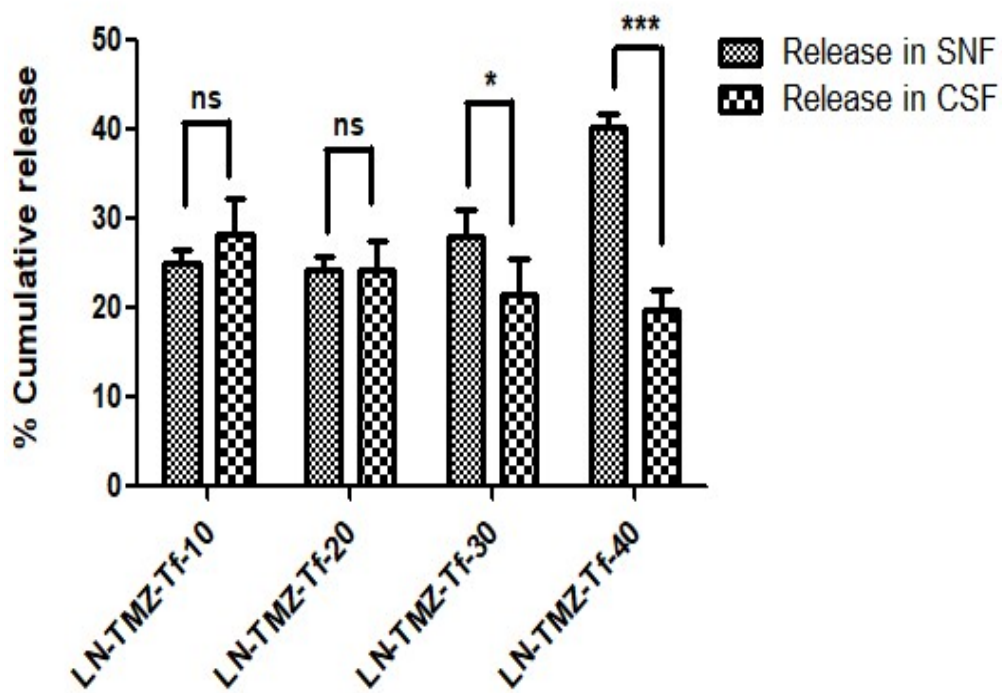

d

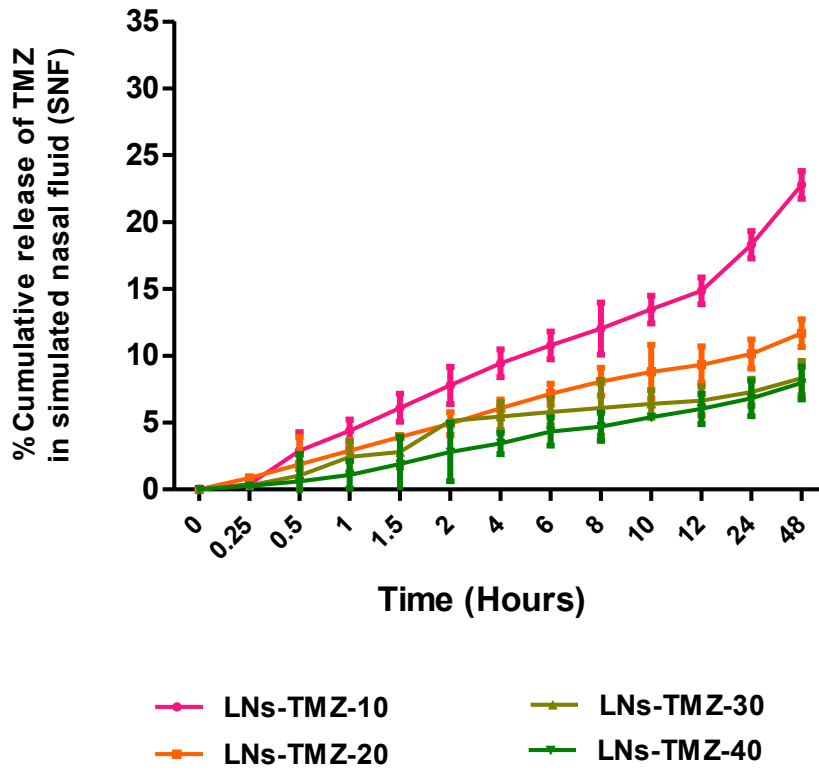

e

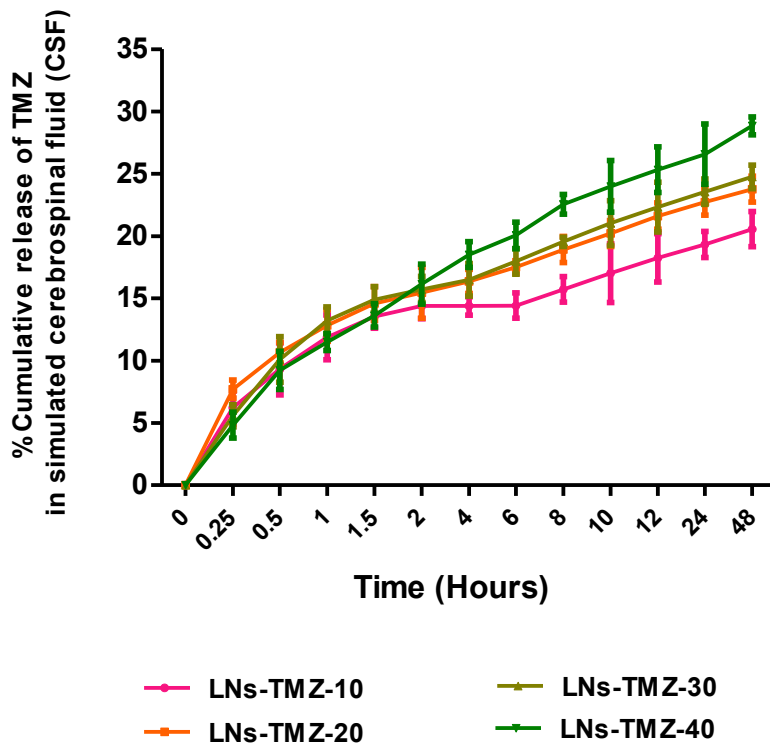



f

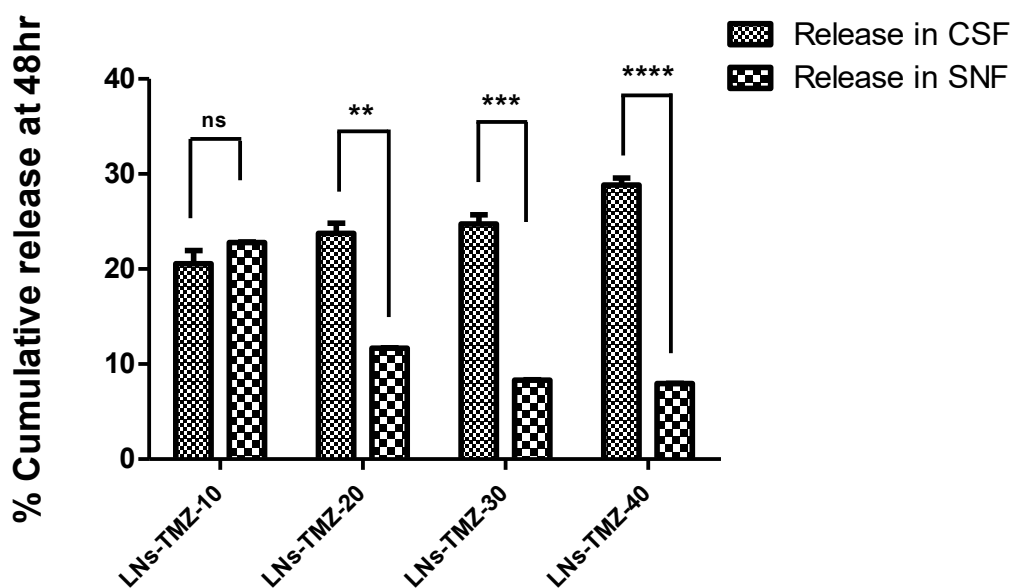

**Figure S3.** *In-vitro* release kinetics of nanovesicles (a-c) Percent cumulative release of TMZ encapsulated targeted nanovesicles in simulated nasal fluid (SNF) and simulated cerebrospinal fluid (CSF) at 37°C for 48hr and their comparative evaluation in both the fluids at 48hr (d-f) Percent cumulative release of TMZ encapsulated non-targeted nanovesicles in simulated nasal fluid (SNF) and simulated cerebrospinal fluid (CSF) at 37°C for 48hr and their comparative evaluation in both the fluids at 48hr. Values were presented as mean  $\pm$  SEM, ( $n=3$ ). One-way ANOVA showing significant difference at \*\*\* $p \leq 0.001$ , \* $p \leq 0.05$  and  $^{ns}p \geq 0.05$  as non-significant difference, ( $n=3$ ).

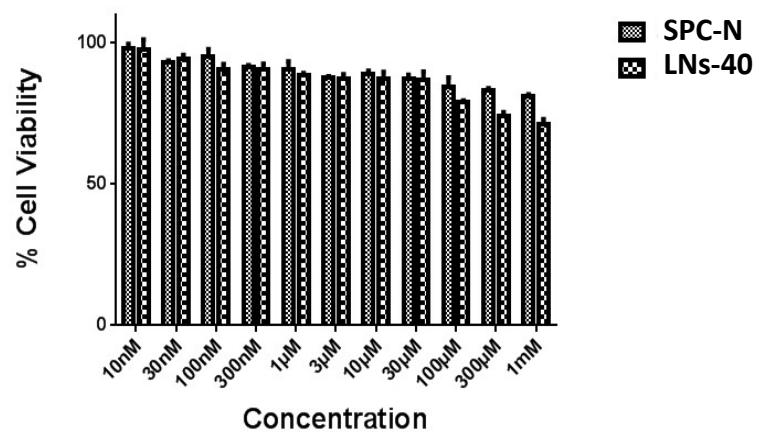

**Figure S4.** *In-vitro* biocompatibility of SPC nanovesicles (SPC-N) and blank nanovesicles (LNs-40) on fibroblast cells.

**Table S1.** Band assignments for IR spectra of porcine brain lipid extract

| Wave number (cm <sup>-1</sup> ) | Vibrations                             | Assignment            |
|---------------------------------|----------------------------------------|-----------------------|
| 2960                            | $\nu_{\text{as}}$ (C-H <sub>3</sub> )  | Saturated fatty acids |
| 2924                            | $\nu_{\text{as}}$ (C-H <sub>2</sub> )  | Saturated fatty acids |
| 2852                            | $\nu_{\text{sym}}$ (C-H <sub>2</sub> ) | Saturated fatty acids |
| 1737-1720                       | $\nu$ (C=O)                            | Phospholipids         |
| 1368                            | $\delta$ (CH <sub>3</sub> )            | Fatty acids           |
| 1222-1224                       | $\nu_{\text{as}}$ (PO <sub>2</sub> )   | Phospholipids         |
| 1071                            | $\nu_{\text{s}}$ (SO <sub>3</sub> )    | Sulfatides            |
| 970                             | N <sup>+</sup> -(CH <sub>3</sub> )     | Phosphatidylcholine   |

**Table S2.** Stability profile of non-targeted TMZ encapsulated nanovesicles as per ICH guidelines.

| Parameters          | Time intervals |           |               |            |               |
|---------------------|----------------|-----------|---------------|------------|---------------|
|                     | Day 0          | 1 month   |               | 6 month    |               |
|                     |                | 4°C       | 25°C±60RH (%) | 4°C        | 25°C±60RH (%) |
| Particle size (nm)  | 121±8.2        | 142.2±3.5 | 162.8±2.1     | 169.2±10.9 | 192.2±3.2     |
| PDI                 | 0.2±0.003      | 0.3±0.002 | 0.3±0.002     | 0.2±0.002  | 0.2±0.001     |
| Zeta potential (mV) | -29.2±1.8      | -30.8±3.9 | -30.2±4.4     | -30.9±3.1  | -31.1±13.2    |
| % EE                | 87.4±2.6       | 85.3± 4.2 | 84.8± 3.9     | 84.8±12.9  | 84.5± 13.2    |

**PDI: Polydispersity index,**  
**% EE: Percent encapsulation efficiency**  
**RH: Relative humidity**

**Table S3.** Brain pharmacokinetics profile of targeted and non-targeted TMZ nanovesicles and free drug in tumor free animals.

| Time intervals (hrs) |      | Free drug (p.o) |          |   | Free drug (i.n) |         |   | LNs-TMZ-40 (i.n) |        |   | LNs-TMZ-Tf-40 (i.n) |        |   |
|----------------------|------|-----------------|----------|---|-----------------|---------|---|------------------|--------|---|---------------------|--------|---|
|                      |      | Conc. (µg/ml)   | SEM      | N | Conc. (µg/ml)   | SEM     | N | Conc. (µg/ml)    | SEM    | N | Conc. (µg/ml)       | SEM    | N |
| 0.0                  | 0.0  | 0.0000          | 0.0000   | 6 | 0.000           | 0.000   | 6 | 0.000            | 0.00   | 6 | 0.000               | 0.000  | 6 |
| 0.5                  | 0.5  | 228.0900        | 123.7700 | 6 | 388.830         | 78.904  | 6 | 554.893          | 105.09 | 6 | 1265.892            | 56.980 | 6 |
| 1.0                  | 1.0  | 493.7210        | 68.8230  | 6 | 1089.997        | 114.890 | 6 | 1512.904         | 92.67  | 6 | 1888.977            | 84.890 | 6 |
| 2.0                  | 2.0  | 590.0360        | 74.8300  | 6 | 712.083         | 144.780 | 6 | 1178.883         | 100.42 | 6 | 1440.042            | 62.043 | 6 |
| 4.0                  | 4.0  | 301.0470        | 32.0900  | 6 | 576.119         | 32.990  | 6 | 1032.760         | 128.67 | 6 | 1205.993            | 78.883 | 6 |
| 8.0                  | 8.0  | 182.0978        | 21.7800  | 6 | 357.783         | 68.620  | 6 | 717.877          | 23.78  | 6 | 893.505             | 30.402 | 6 |
| 24.0                 | 24.0 | 62.8020         | 18.9800  | 6 | 106.892         | 57.890  | 6 | 401.920          | 28.67  | 6 | 576.922             | 69.542 | 6 |

**Table S4.** Plasma pharmacokinetics profile of targeted and non-targeted TMZ nanovesicles and free drug in tumor free animals.

| Time intervals (hrs) | Free drug (p.o) |        |   | Free drug (i.n) |        |   | LNs-TMZ-40 (i.n) |       |   | LNs-TMZ-Tf-40 (i.n) |       |   |
|----------------------|-----------------|--------|---|-----------------|--------|---|------------------|-------|---|---------------------|-------|---|
|                      | Conc. (µg/ml)   | SEM    | N | Conc. (µg/ml)   | SEM    | N | Conc. (µg/ml)    | SEM   | N | Conc. (µg/ml)       | SEM   | N |
| 0.0000               | 0.0000          | 0.00   | 6 | 0.000           | 0.000  | 6 | 0.000            | 0.00  | 6 | 0.000               | 0.00  | 6 |
| 0.5000               | 533.9210        | 21.03  | 6 | 583.908         | 18.560 | 6 | 417.044          | 18.97 | 6 | 378.743             | 20.92 | 6 |
| 1.0000               | 958.9930        | 49.32  | 6 | 820.774         | 39.320 | 6 | 685.403          | 23.78 | 6 | 439.919             | 33.45 | 6 |
| 2.0000               | 1262.0320       | 102.10 | 6 | 938.566         | 27.530 | 6 | 572.099          | 31.09 | 6 | 344.795             | 39.77 | 6 |
| 4.0000               | 523.4180        | 45.32  | 6 | 428.972         | 40.090 | 6 | 318.674          | 20.98 | 6 | 198.932             | 12.98 | 6 |
| 8.0000               | 234.9120        | 19.09  | 6 | 209.689         | 18.998 | 6 | 153.554          | 8.99  | 6 | 102.977             | 18.78 | 6 |
| 24.0000              | 97.4480         | 8.47   | 6 | 86.058          | 10.980 | 6 | 62.997           | 12.45 | 6 | 39.046              | 10.34 | 6 |
